# Supplementary material for: Additive-assisted synthesis and optoelectronic properties of (CH3NH3)4Bi6I22
Source: Royal Society of Chemistry journal article supplement (doi:10.1039/c9qi01574d), 2020-01-01
Supplement: c9qi01574d1.pdf [file c9qi01574d1.pdf]

# Additive-assisted synthesis and optoelectronic properties of $(\text{CH}_3\text{NH}_3)_4\text{Bi}_6\text{I}_{22}$

*Manila Sharma,<sup>1</sup> Aymen Yangui,<sup>1</sup> Alain Lusso,<sup>2</sup> Kamel Boukhedden,<sup>2</sup> Xiixin Ding,<sup>4</sup> Mao-Hua Du,<sup>3</sup>  
Krzysztof Gofryk,<sup>4</sup> Bayrammurad Saparov<sup>1\*</sup>*

<sup>1</sup>Department of Chemistry and Biochemistry, University of Oklahoma, 101 Stephenson Parkway, Norman, Oklahoma 73019, United States

<sup>2</sup>Groupe d'Étude de la Matière Condensée, CNRS-UMR8635, Université de Versailles Saint Quentin, Université Paris-Saclay, 45 Avenue des États-Unis, 78035 Versailles cedex, France.

<sup>3</sup>Materials Science and Technology Division, Oak Ridge National Laboratory, Oak Ridge, TN 37831, USA

<sup>4</sup>Idaho National Laboratory, Idaho Falls, ID 83415, USA

## Supporting Information

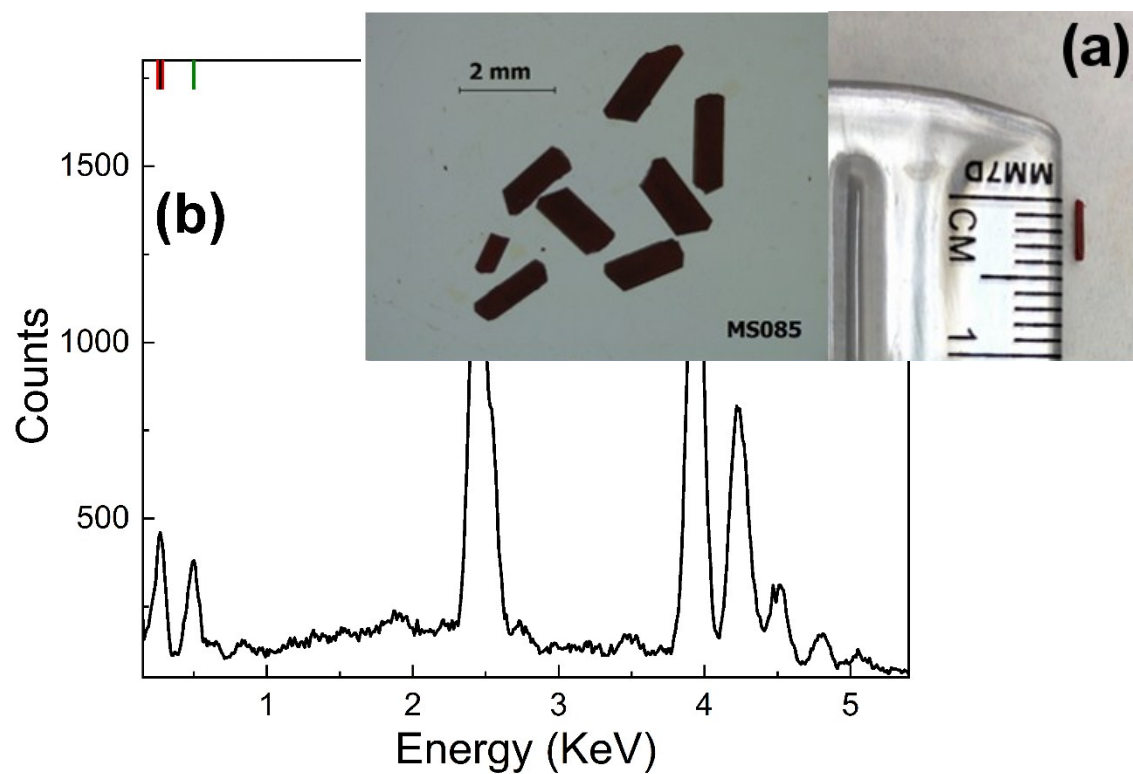

**Figure S1.** (a) An optical image of as-prepared deep red crystals of  $(MA)_4Bi_6I_{22}$ . (b) A typical energy-dispersive X-ray (EDX) spectrum for a  $(MA)_4Bi_6I_{22}$  crystal.

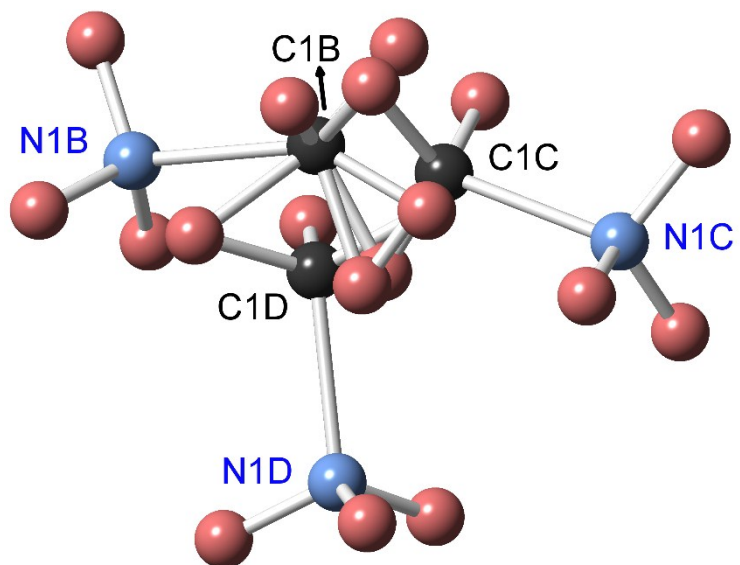

**Figure S2.** Rotational disorder in methylammonium cation in  $(\text{MA})_4\text{Bi}_6\text{I}_{22}$ .

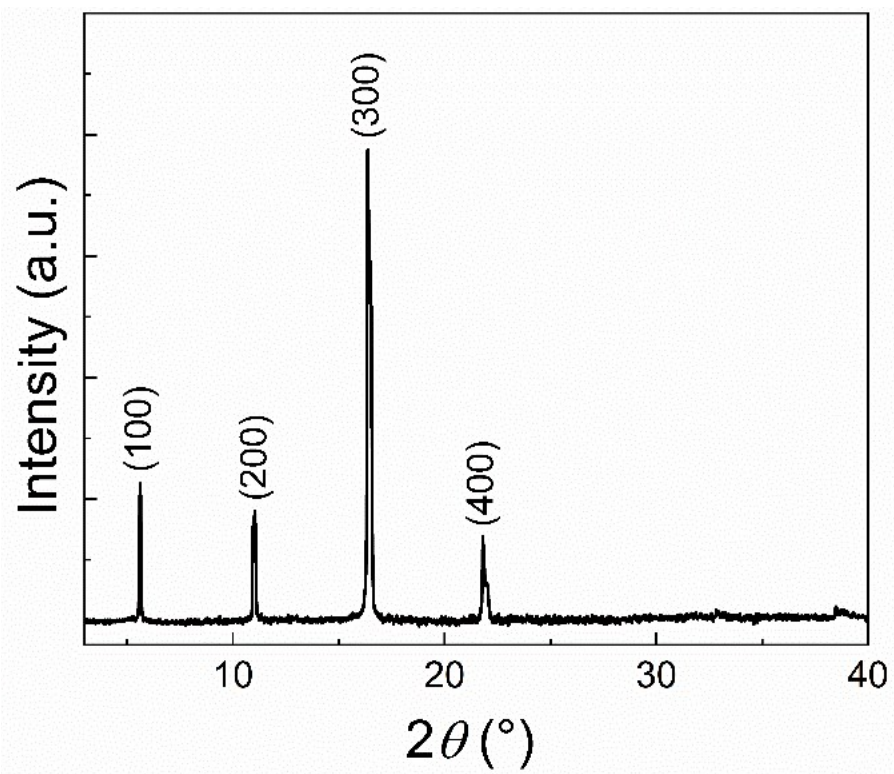

**Figure S3.** An experimental XRD pattern measured for a single crystal of  $(\text{MA})_4\text{Bi}_6\text{I}_{22}$  at room temperature.

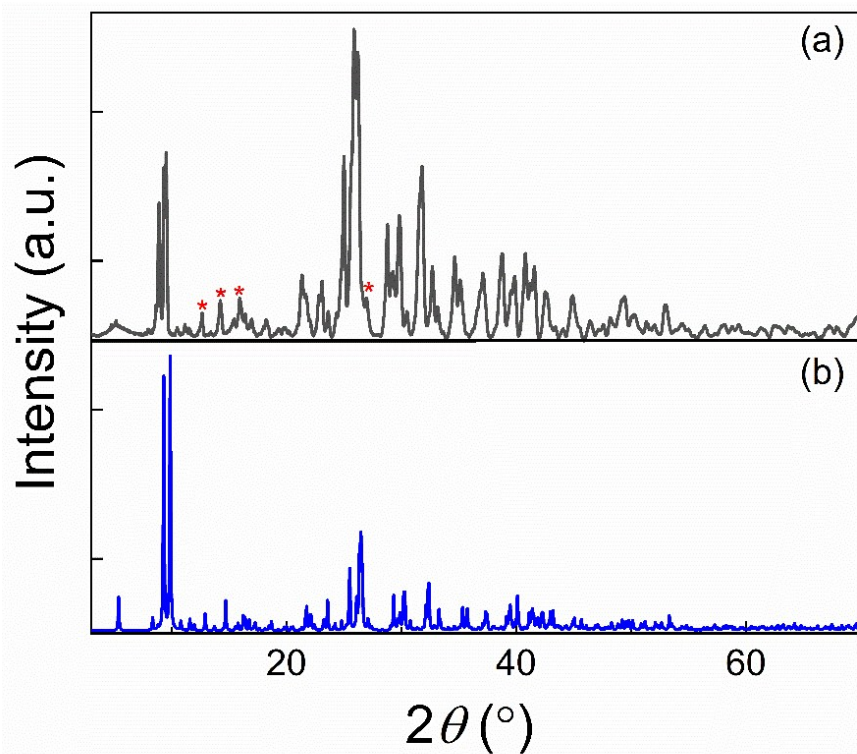

**Figure S4.** (a) Upon grinding  $(\text{MA})_4\text{Bi}_6\text{I}_{22}$  single crystals, an emergence of  $\text{BiI}_3$  impurity peaks (masked with red stars) is clearly noticeable in PXRD patterns. (b) The simulated PXRD pattern for  $(\text{MA})_4\text{Bi}_6\text{I}_{22}$ .

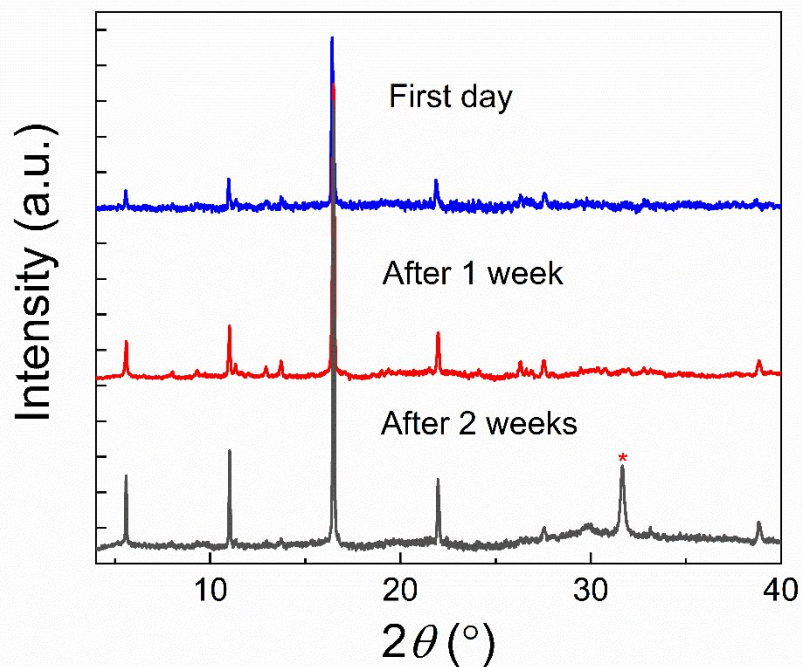

**Figure S5.** PXR D patterns of as-prepared crystals (blue) of  $(\text{MA})_4\text{Bi}_6\text{I}_{22}$ , and after 1 week (red) and 2 weeks (black) exposure to ambient air. After 2 weeks, appearance of an impurity peak (most likely BiOI, marked with a red star) is noticeable.

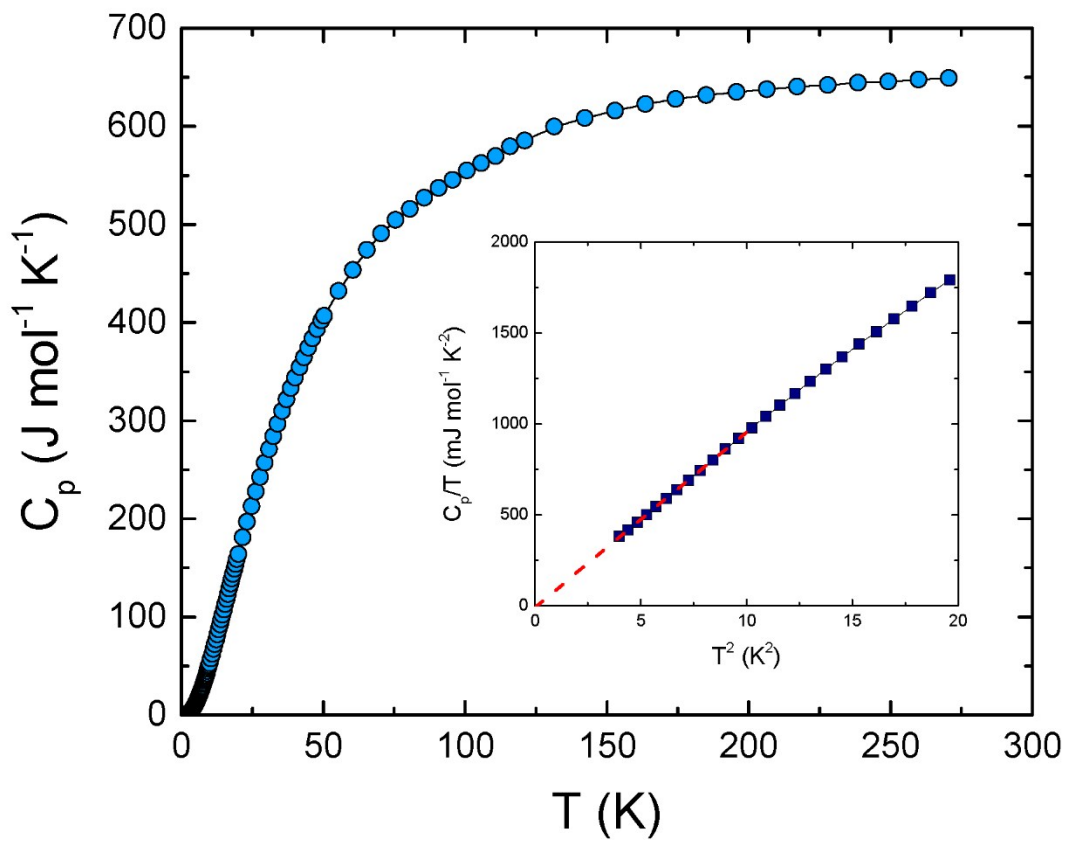

**Figure S6.** The temperature dependence of specific heat for  $(\text{MA})_4\text{Bi}_6\text{I}_{22}$ . The inset shows plot of  $C/T$  vs  $T^2$ .

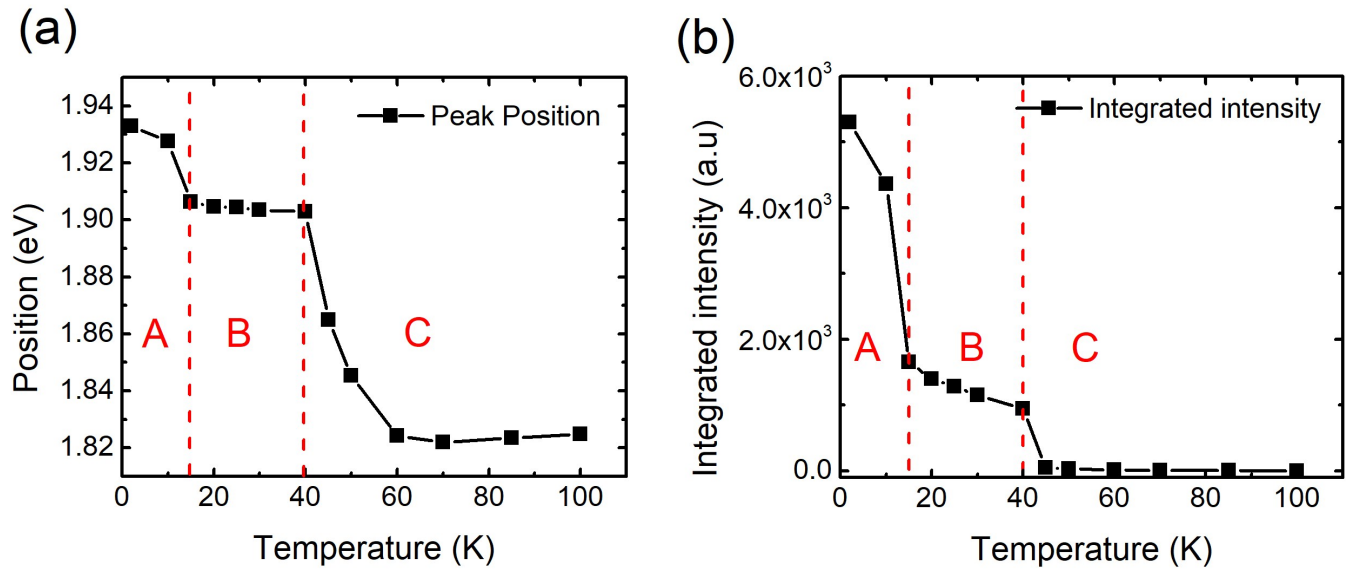

**Figure. S7.** Temperature dependence of (a) PL peak position and (b) integrated PL intensity. Dashed lines highlight the presence of three different regimes noted A, B, and C.



**Table S1.** Selected interatomic distances (Å) and angles (°) in (MA)<sub>4</sub>Bi<sub>6</sub>I<sub>22</sub>.

| Label |     | Distance  | Label      | Angle       |
|-------|-----|-----------|------------|-------------|
| Bi1-  | I1  | 2.9622(6) | I1-Bi1-I2  | 94.39(2)    |
|       | I2  | 2.9273(8) | I2-Bi1-I5  | 87.31(2)    |
|       | I3  | 2.8623(7) | I1-Bi1-I5  | 173.431(18) |
|       | I4  | 3.2546(7) | I2-Bi1-I4  | 172.27(2)   |
|       | I5  | 3.2528(6) |            |             |
|       | I7  | 3.4161(6) |            |             |
| Bi2-  | I4  | 3.2433(6) | I4-Bi2-I5  | 89.694(17)  |
|       | I4  | 3.3840(6) | I5-Bi2-I8  | 90.849((18) |
|       | I5  | 3.0369(7) | I4-Bi2-I8  | 172.871(17) |
|       | I6  | 2.8522(6) | I5-Bi2-I7  | 172.470(17) |
|       | I7  | 3.1596(7) |            |             |
|       | I8  | 2.9618(6) |            |             |
| Bi3-  | I1  | 3.3957(7) | I7-Bi3-I8  | 82.790(16)  |
|       | I7  | 3.3640(6) | I8-Bi3-I11 | 92.925(19)  |
|       | I8  | 3.3717(7) | I7-Bi3-I11 | 168.412(17) |
|       | I9  | 2.8873(7) | I8-Bi3-I10 | 170.987(18) |
|       | I10 | 2.8788(7) |            |             |
|       | I11 | 2.8813(6) |            |             |
